# Supplementary material for: Defensive shimmering responses in Apis dorsata are triggered by dark stimuli moving against a bright background
Source: Oxford University Press journal article supplement (doi:10.1242/jeb.244716), 2022-08-02
Supplement: jeb244716supp.pdf [file jeb244716supp.pdf]

**Table S1. Dataset for daylight trials.** Detailed explanation of the dataset is below

| Column      | Description                                                         |
|-------------|---------------------------------------------------------------------|
| hiveID      | Hive used in the trial                                              |
| colourCards | Shade of stimulus (B: black, G1: light grey, G3: dark grey)         |
| cardSize    | Size of stimulus in cm                                              |
| moveDir     | Orientation of stimulus motion (H: horizontal, V: vertical)         |
| moveSec     | Section of the frame where the trial was done (L: left, R: right)   |
| bgColour    | Shade of the background                                             |
| trialTime   | Date-time of the trial (yyyy-mm-dd HH:MM:SS)                        |
| trialID     | Link to CSV file of ImageJ output                                   |
| cumArea     | Cumulative area of shimmering response for a trial                  |
| avgArea     | Average area of shimmering response to one movement of the stimulus |
| Comments    |                                                                     |

[Click here to download Table S1](#)

**Table S2. Dataset for twilight trials.** Detailed explanation of the dataset is below

| Column     | Description                                                         |
|------------|---------------------------------------------------------------------|
| hiveID     | Hive used in the trial                                              |
| trialID    | Link to CSV file of ImageJ output                                   |
| cumArea    | Cumulative area of shimmering response for a trial                  |
| avgArea    | Average area of shimmering response to one movement of the stimulus |
| time       | Time of the day when trial was carried out (HH:MM:SS)               |
| date       | Date when trial was conducted (yyyy-mm-dd)                          |
| category   | Time period when trial was carried out                              |
| lightLevel | Illuminance (lux)                                                   |

[Click here to download Table S2](#)

**Table S3. Dataset for reflectance spectra** Detailed explanation of the dataset is below

| Column       | Description                                     |
|--------------|-------------------------------------------------|
| wavelength1  | Wavelength at which reflectance is measured     |
| reflectance1 | Reflectance of the black stimuli and background |
| wavelength2  | Wavelength at which reflectance is measured     |
| reflectance2 | Reflectance of the grey background              |
| wavelength3  | Wavelength at which reflectance is measured     |
| reflectance3 | Reflectance of the dark grey stimuli            |
| wavelength4  | Wavelength at which reflectance is measured     |
| reflectance4 | Reflectance of the light grey stimuli           |

[Click here to download Table S3](#)

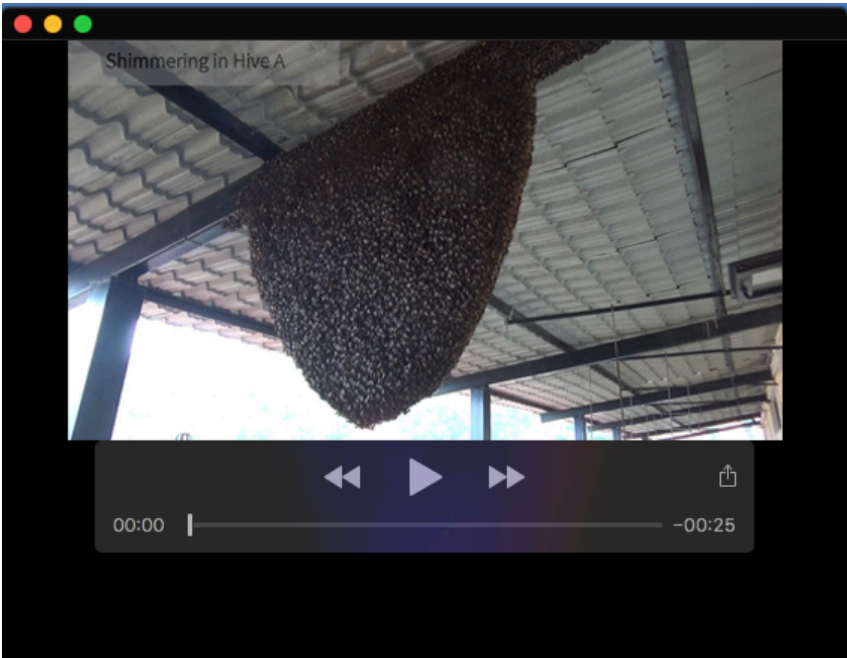

**Movie 1.** Representative instances of shimmering reponse in Hive A and Hive B.

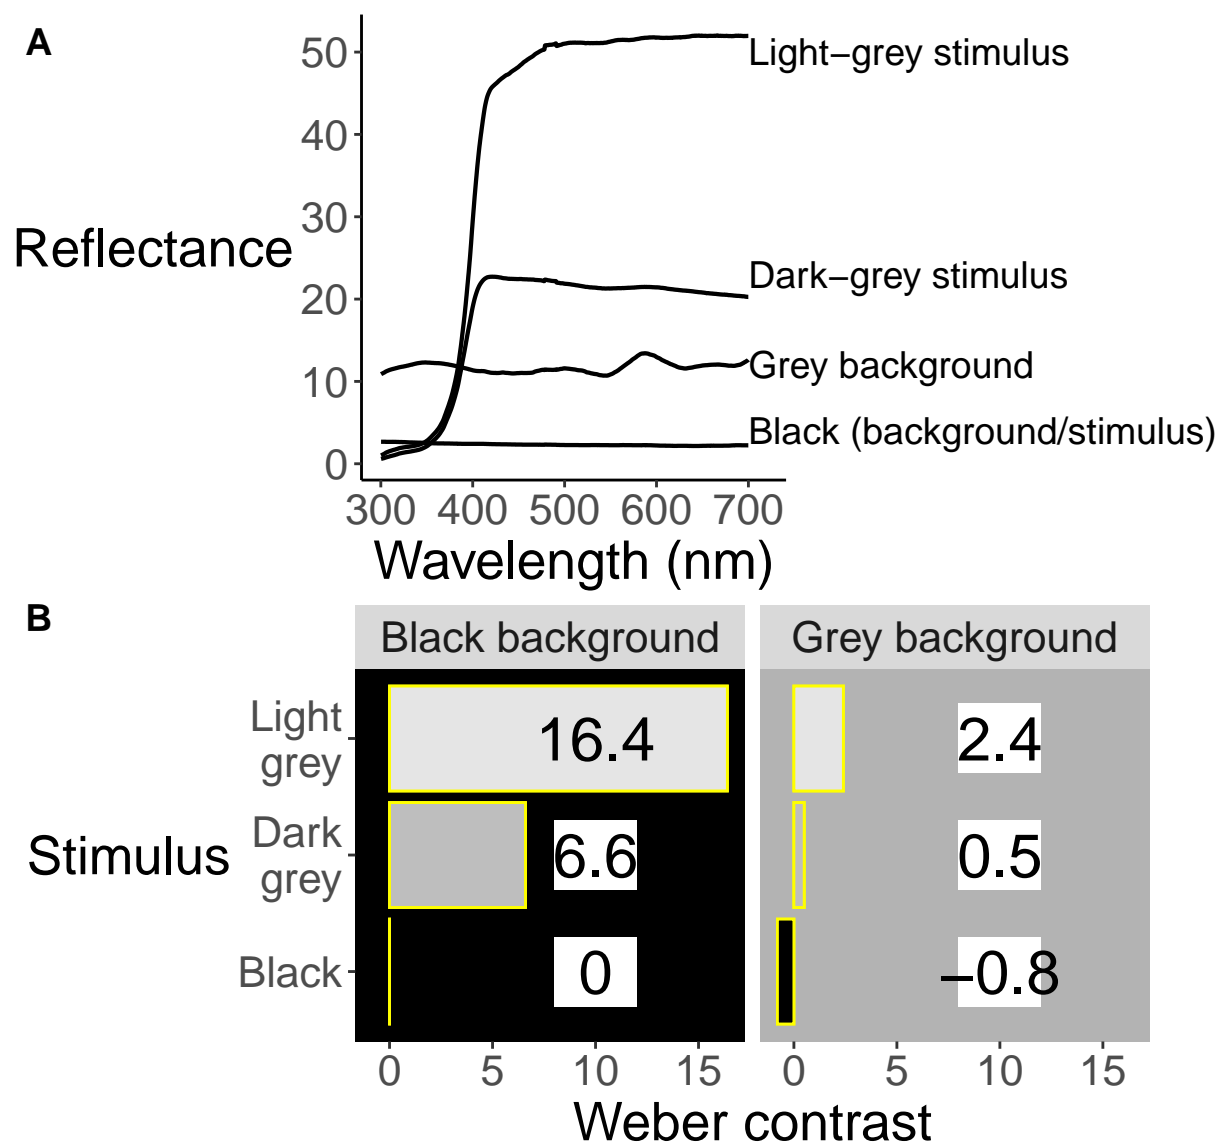

**Fig. S1. Reflectance spectra and contrasts of stimuli.** A) The reflectance spectra of the stimuli and backgrounds were recorded using an Ocean Insight Ocean-HDX-UV-VIS spectrophotometer connected to an Ocean Optics PX-2 pulsed Xenon light-source. The spectra were captured to a PC (Acer One 110-ICT) running the Ocean View software and saved as a spreadsheet. B) The Weber contrasts of the stimuli against the grey or black backgrounds were calculated using the formula provided in the main text, adapted from O'Carroll & Wiederman 2014. The contrast values are written inside/beside the corresponding bars.

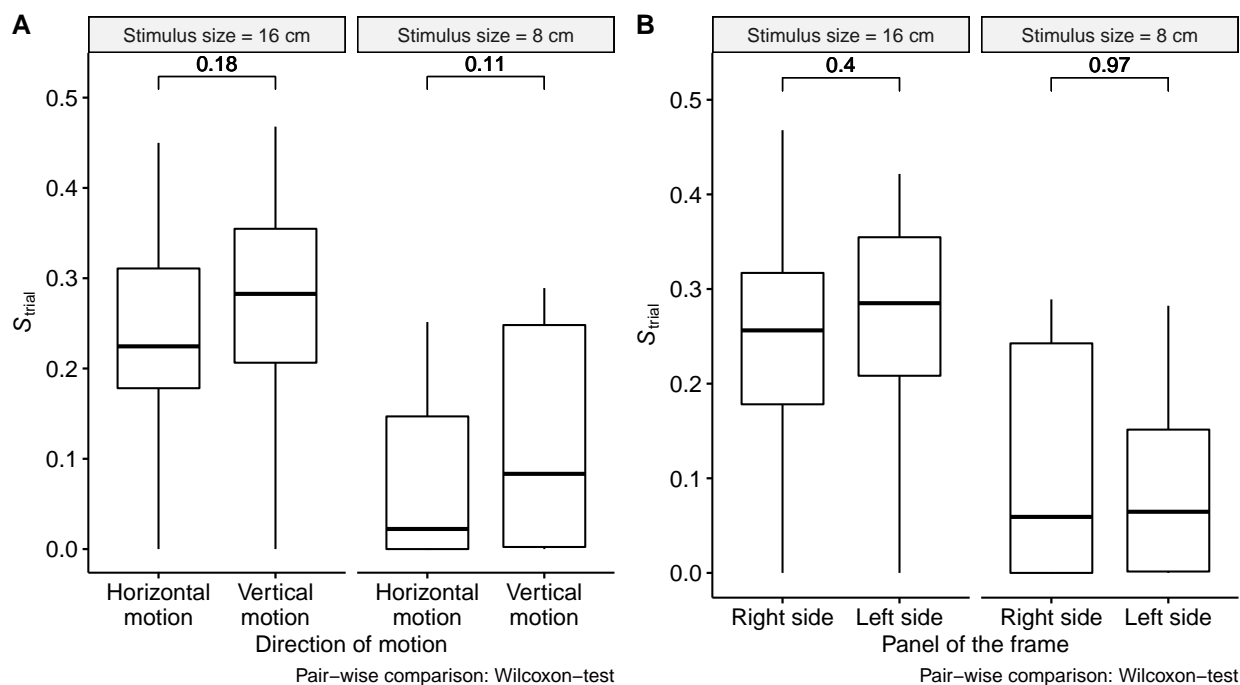

**Fig. S2. Effect of orientation of motion and side of the trial on shimmering response.** Pairwise comparison of shimmering responses between direction of motion (**A**)

and side of the panel (**B**).  $S_{\text{trial}}$  refers to the shimmering strength of each trial (refer to main text). The *numbers in boldface* correspond to the p-value of the comparison. There was no effect of direction of motion or side of panel for all stimuli sizes. Hence these two variables were excluded from the final model.

**Beta-regression modelling and comparison between models**

**Table S4. Comparison of the beta-regression models quantifying the shimmering response of black stimuli against grey background during bright light conditions**

|        | dAIC     | Degrees of freedom | Model description                                 |
|--------|----------|--------------------|---------------------------------------------------|
| glm.4  | 0.000    | 29                 | Hierarchical, variable precision (stimulus size)  |
| glm.5  | 1584.676 | 28                 | Hierarchical, variable precision (stimulus shade) |
| glm.2  | 2124.989 | 49                 | Hive identity as fixed effect                     |
| glm.1  | 2136.250 | 25                 | Pooled-data, single precision                     |
| glm.3  | 2138.109 | 26                 | Hierarchical, single precision                    |
| glm.0  | 2591.786 | 2                  | Pooled-data null model                            |
| glm.01 | 2593.786 | 3                  | Hierarchical null model                           |

**Table S5. Beta-regression models comparing the shimmering response during daylight to that occurring in twilight**

|        | dAIC     | Degrees of freedom | Model description       |
|--------|----------|--------------------|-------------------------|
| glm.6  | 0.00000  | 3                  | Pooled-data model       |
| glm.7  | 2.00000  | 4                  | Hierarchical model      |
| glm.02 | 88.15653 | 2                  | Pooled-data null model  |
| glm.03 | 89.86991 | 3                  | Hierarchical null model |

## Supplementary Materials and Methods

*This document was generated from the Supplementary Materials and Methods file. The details of the session and the packages used to generate this file are printed below*

### Session and packages info

```
## setting value
## version R version 4.1.3 (2022-03-10)
## os Fedora Linux 35 (Workstation Edition)
## system x86_64, linux-gnu
## ui X11
## language en_GB
## collate en_IN.UTF-8
## ctype en_IN.UTF-8
## tz Asia/Kolkata
## date 2022-07-28
## pandoc 2.14.0.3 @ /usr/libexec/rstudio/bin/pandoc/ (via rmarkdown)

## package ondiskversion
## bbmle bbmle 1.0.25
## boot boot 1.3.28
## cowplot cowplot 1.1.1
## dplyr dplyr 1.0.7
## emmeans emmeans 1.7.1.1
## EnvStats EnvStats 2.7.0
## ggpattern ggpattern 0.4.3.3
## ggplot2 ggplot2 3.3.6
## ggpubr ggpubr 0.4.0
## glmmTMB glmmTMB 1.1.2.3
## latex2exp latex2exp 0.5.0
## lsmeans lsmeans 2.30.0
## lubridate lubridate 1.8.0
## stringr stringr 1.4.0
## tidyr tidyr 1.1.4
##
## source
## bbmle CRAN (R 4.1.3)
## boot CRAN (R 4.1.3)
## cowplot CRAN (R 4.1.2)
## dplyr CRAN (R 4.1.1)
## emmeans CRAN (R 4.1.2)
## EnvStats CRAN (R 4.1.3)
## ggpattern Github (coolbutuseless/ggpattern@1f46c8bc0c547cdbc3cc051e81e94625a1e0f1a6)
## ggplot2 CRAN (R 4.1.3)
## ggpubr CRAN (R 4.1.2)
## glmmTMB CRAN (R 4.1.2)
## latex2exp CRAN (R 4.1.2)
## lsmeans CRAN (R 4.1.3)
## lubridate CRAN (R 4.1.2)
## stringr CRAN (R 4.1.2)
## tidyr CRAN (R 4.1.1)
```

*The last section of the Supplementary Materials and Methods (sajesh\_etal\_2022\_rev\_ESM.Rmd) contains the code for Figs. 2-4 in the main text. The plots can be generated by changing the value of the `include` argument in the corresponding code-chunk to `TRUE`*
